# Supplementary material for: Effect of Ball-Milling Pretreatment of Cellulose on Its Photoreforming for H2 Production
Source: PubMed Central journal article supplement (PMC9098191; doi:10.1021/acssuschemeng.1c07301), 2022-04-04
Supplement: sc1c07301_si_001.pdf [file sc1c07301_si_001.pdf]

# **Effect of ball-milling pre-treatment of cellulose on its photoreforming for H<sub>2</sub> production**

## **Supporting Information (SI)**

Lan Lan, Huanhao Chen, Daniel Lee, Shaojun Xu, Nathan Skillen, Aleksander Tedstone, Peter Robertson ,  
Arthur Garforth, Helen Daly, Christopher Hardacre , Xiaolei Fan

Number of pages: 11

Number of figures: 8

Number of tables: 4

## Contents:

1. Preparation method of 0.16%-Pt/m-TiO<sub>2</sub> catalyst.
2. **Fig. S1.** Schematic structure of cellulose
3. **Fig. S2.** Time course of H<sub>2</sub> production from photoreforming of MCC-0 and BM treated MCCs. Reaction conditions: 100 mg of substrate, 75 mg of 0.16 wt.% Pt/m-TiO<sub>2</sub> catalyst, 100 ml distilled water under the irradiation of UV-A lamp (incident photon rate: 62 μmol h<sup>-1</sup> photons, 1 mol (6.0223×10<sup>23</sup>) is 1 Einstein of photons.) at 40 °C for 5 hours.
4. **Fig. S3.** Distribution of the averaged H<sub>2</sub> production rate ( $r_{H_2}$ , black scatters) and quantum yield ( $\Phi_a$ , red scatters) from the photoreforming systems as a function of  $DP$  of the MCC-0 and BM-treated MCCs.
5. **Fig. S4.** SEM images of (a) MCC-0, (c) BM-2 (e) BM-16 (g) BM-24, and particle size distribution of (b) MCC-0, (d) BM-2 (f) BM-16 (h) BM-24.
6. ATR-IR characterisation of ball-milled MCCs
7. **Fig. S5.** ATR spectra of the MCC-0 (black spectrum), MCC-0.5 (red spectrum) and MCC-24 (blue spectrum).
8. Deconvolutions of <sup>13</sup>C chemical shifts in C4 region of MCCs from ss NMR characterisation
9. **Fig. S6.** <sup>13</sup>C ssNMR spectra of (a) MCC-0, (b) BM-0.5-REC, (c) BM-2-REC, (d) BM-6-REC, and (e) BM-24-REC. Examples of deconvoluted <sup>13</sup>C ssNMR spectra for (f) crystalline cellulose I with amorphous cellulose in C4 region of MCC-0: crystalline residue α (I-α), residue β (I-β), residue γ (I-γ), para-crystalline residue δ (I-δ), and amorphous cellulose (A-α); and for (g) crystalline cellulose II with disordered cellulose in C4 region of BM-24-REC: crystalline residue a (II-a), residue b (II-b), residue c (II-c), residue d (II-d), amorphous a (A-a) and amorphous b (A-b).
10. **Table S1.** Crystalline index ( $CrI$ ) calculated from <sup>13</sup>C ssNMR in C4 and C6 regions of cellulose I and cellulose II, and relative intensity of <sup>13</sup>C signal in glucose C1 region
11. ATR-IR characterisation of water-exposed BM-treated MCCs
12. **Fig. S7.** ATR-IR spectra of (a) MCC-0-WE, (b) recrystallised BM-treated MCCs: BM-0.5-REC (red) and BM-24-REC (blue), and (c) as-prepared BM-treated MCCs: BM-0.5 (red) and BM-24 (blue); (d) MCC-0 (grey) with grey spectra showing the change in 897 cm<sup>-1</sup> band with milling time (BM-0.5 to BM-24), and (e) MCC-0-WE (black) with grey spectra showing the change in 897 cm<sup>-1</sup> band with BM time after exposure to water (BM-0.5-REC to BM-24-REC).
13. **Fig. S8.** HPLC-RI analysis of the filtrates from MCC washing: (a) MCC-0 and BM-treated MCCs.
14. Mass-balance experiment
15. **Table S2.** Mass loss of the photoreforming reaction of MCC-0 and ball-milled cellulose
16. **Table S3.** The state-of-the-art of H<sub>2</sub> produced from cellulose photoreforming
17. **Table S4.** The normalised  $r_{H_2}$  (by Pt loading amount) of ball-milled MCCs

## Preparation method of 0.16%-Pt/m-TiO<sub>2</sub> catalyst

0.16%-Pt/m-TiO<sub>2</sub> catalyst was prepared by wet impregnation. The procedure of making the 0.16%-Pt/m-TiO<sub>2</sub> catalyst is described as: 1 g m-TiO<sub>2</sub> support (mixed phase of rutile and anatase, Aldrich®) was dispersed in 9.58 ml of deionised water in a beaker and stirred for 10 min. Then 0.42 ml of the metal precursor solution ( $C = 0.01 \text{ g ml}^{-1}$ , H<sub>2</sub>PtCl<sub>6</sub>·6H<sub>2</sub>O dissolved in deionised water, Honeywell Fluka®) was added into the TiO<sub>2</sub> slurry. The mixture was stirred at 60 °C for 4 h, and the resulting catalyst was dried at 150 °C for 2 h and calcined in air at 500 °C for 2 h. Prior to the catalytic test, catalyst were reduced in pure H<sub>2</sub> at 200 °C for 30 min.

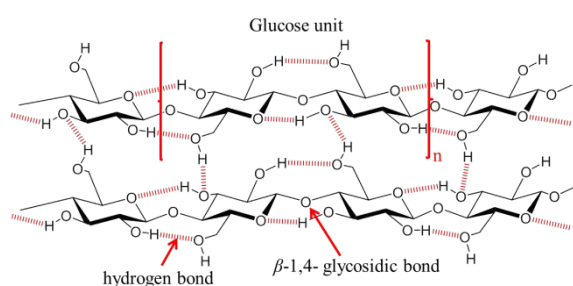

**Fig. S1.** Schematic structure of cellulose.

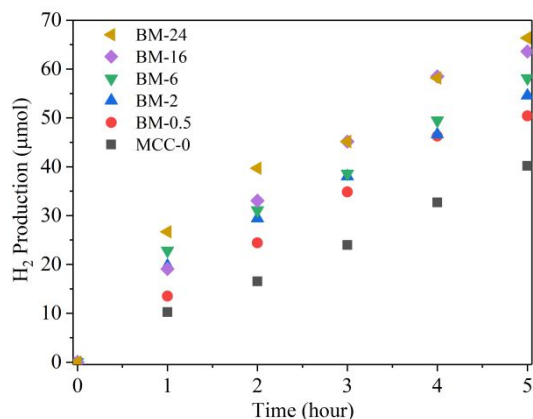

**Fig. S2.** Time course of H<sub>2</sub> production from photoreforming of MCC-0 and BM treated MCCs. Reaction conditions: 100 mg of substrate, 75 mg of 0.16 wt.% Pt/m-TiO<sub>2</sub> catalyst, 100 ml distilled water under the irradiation of UV-A lamp (incident photon rate: 62 μmol h<sup>-1</sup> photons, 1 mol (6.0223×10<sup>23</sup>) is 1 Einstein of photons.) at 40 °C for 5 hours.

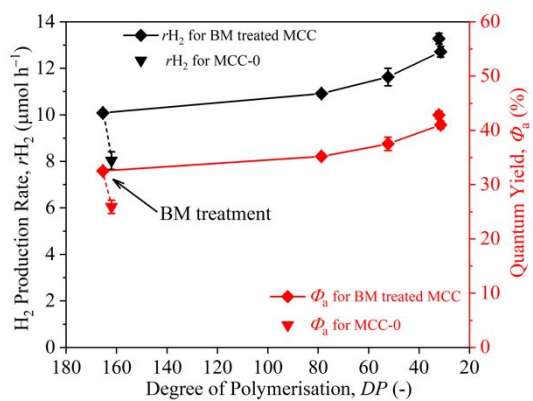

**Fig. S3.** Distribution of the averaged H<sub>2</sub> production rate ( $r_{H_2}$ , black scatters) and quantum yield ( $\Phi_a$ , red scatters) from the photoreforming systems as a function of  $DP$  of the MCC-0 and BM-treated MCCs.

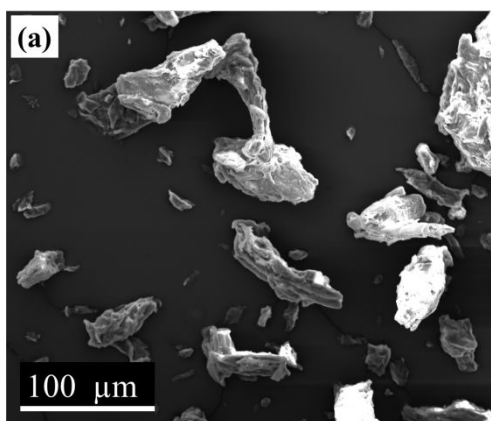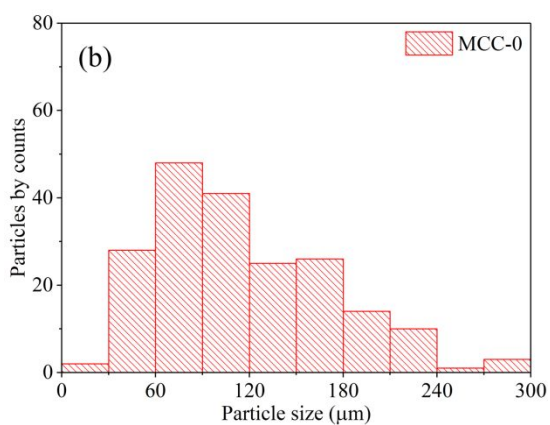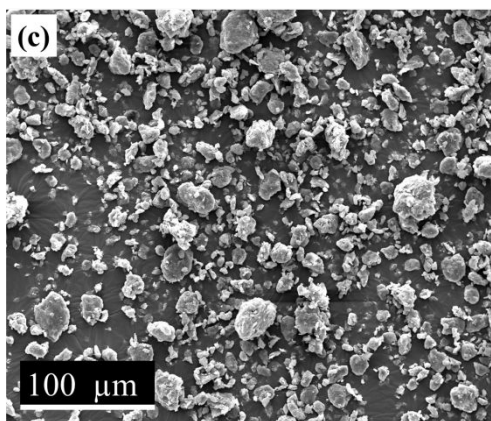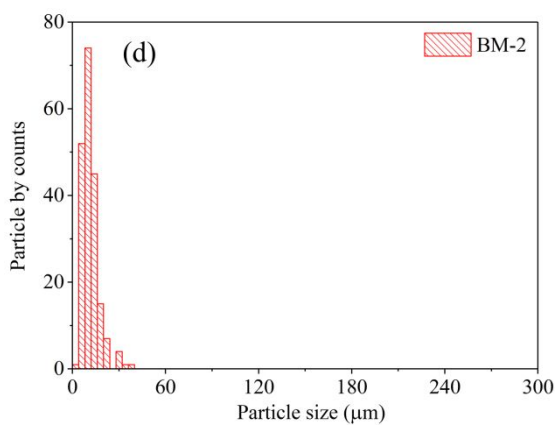

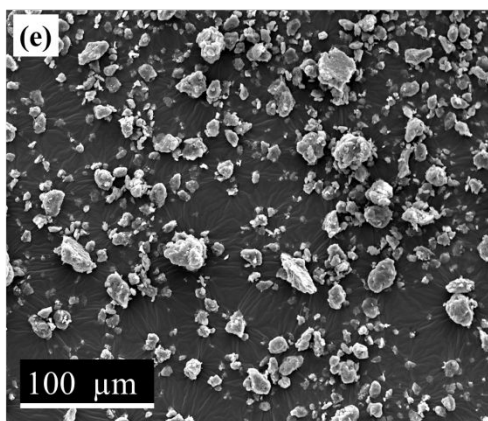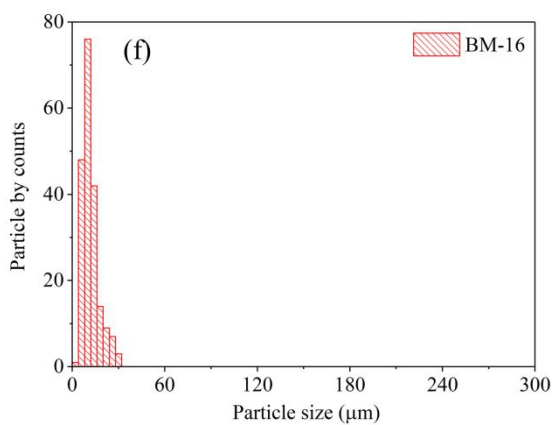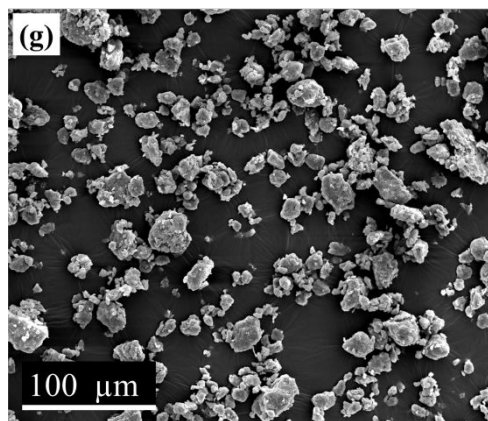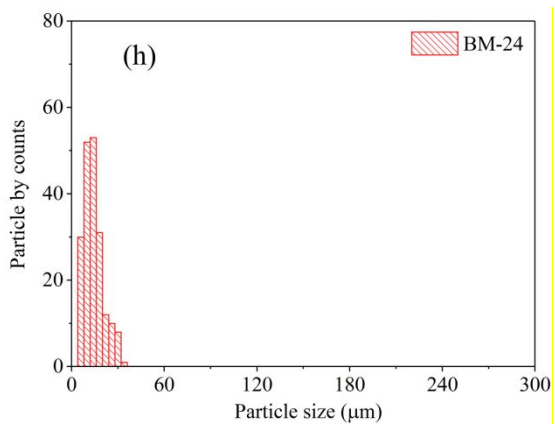

**Fig. S4.** SEM images of (a) MCC-0, (c) BM-2 (e) BM-16 (g) BM-24, and particle size distribution of (b) MCC-0, (d) BM-2 (f) BM-16 (h) BM-24.

## ATR-IR characterisation of ball-milled MCCs

The conversion of cellulose I to amorphous cellulose after BM was also supported by ATR-IR characterisation as shown in **Fig. S5**. In detail, the disappearance of cellulose I IR absorption bands at 1106, 1315, 1335 and 1428  $\text{cm}^{-1}$  in the BM-treated MCCs, and a band at 897  $\text{cm}^{-1}$  representing amorphous cellulose were observed. Both XRD and ATR-IR characterisation showed the effectiveness BM for amorphising the MCC after  $\geq 2$  h treatment.

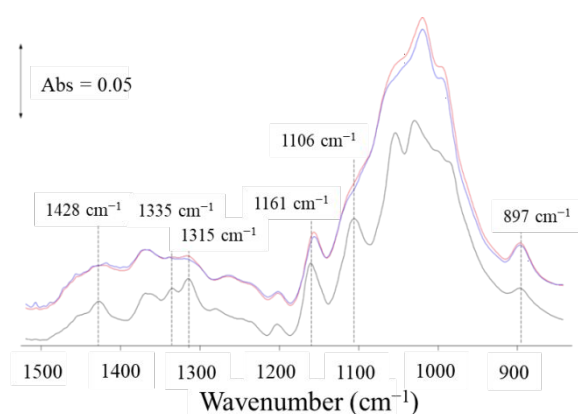

**Fig. S5.** ATR spectra of the MCC-0 (black spectrum), BM-0.5 (red spectrum) and BM-24 (blue spectrum).

## Deconvolutions of $^{13}\text{C}$ chemical shifts in C4 region of MCCs from ss NMR characterisation

In the C4 region of cellulose I (**Fig. S6f**), the  $^{13}\text{C}$  chemical shifts were assigned to 4 crystalline signals (I- $\alpha$ : 89.4 ppm, I- $\beta$ : 87.8 ppm, I- $\gamma$ : 88.8 ppm, and I- $\delta$ : 88.4 ppm), and a broad signal for amorphous cellulose (A- $\alpha$ : 83.8 ppm).<sup>1</sup> While, in the C4 region of cellulose II (as shown in **Fig. S6g**), the  $^{13}\text{C}$  chemical shifts were assigned to 4 crystalline signals (II-a: 87.5 ppm, II-b: 88.66 ppm, II-c: 86.3 ppm and II-d: 84.8 ppm), and 2 broad signals for amorphous cellulose (A-a: 82.85 ppm and A-b: 79.6 ppm).<sup>2</sup>

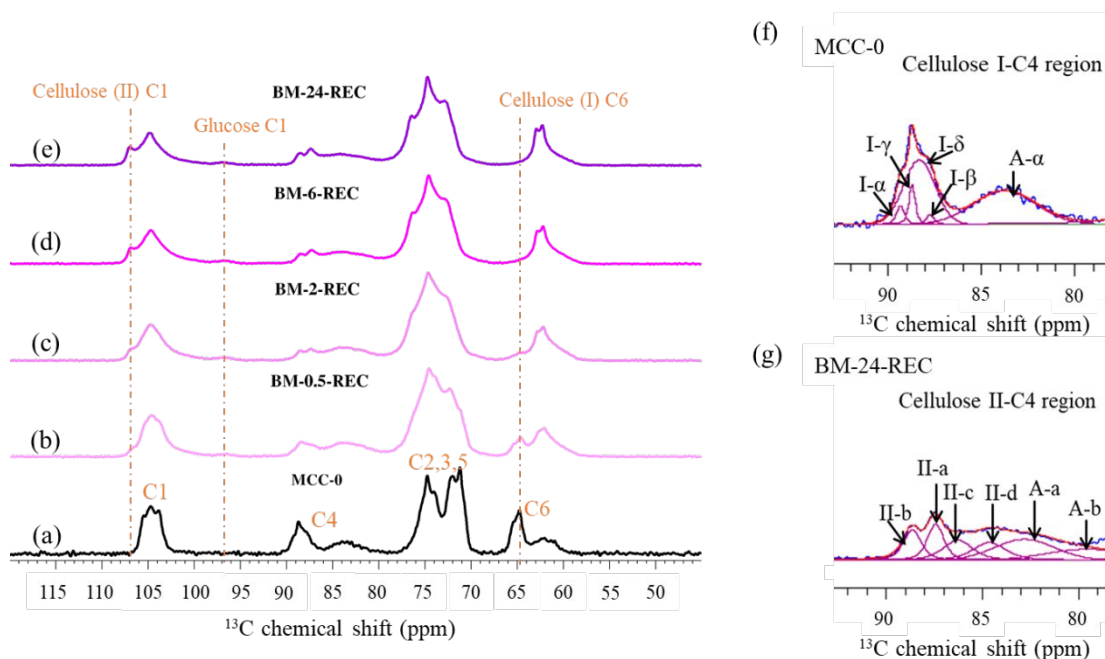

**Fig. S6.**  $^{13}\text{C}$  ssNMR spectra of (a) MCC-0, (b) BM-0.5-REC, (c) BM-2-REC, (d) BM-6-REC, and (e) BM-24-REC. Examples of deconvoluted  $^{13}\text{C}$  ssNMR spectra for (f) crystalline cellulose I with amorphous cellulose in C4 region of MCC-0: crystalline residue  $\alpha$  (I- $\alpha$ ), residue  $\beta$  (I- $\beta$ ), residue  $\gamma$  (I- $\gamma$ ), para-crystalline residue  $\delta$  (I- $\delta$ ), and amorphous cellulose (A- $\alpha$ ); and for (g) crystalline cellulose II with disordered cellulose in C4 region of BM-24-REC: crystalline residue a (II-a), residue b (II-b), residue c (II-c), residue d (II-d), amorphous a (A-a) and amorphous b (A-b).

**Table S1.** Crystalline index ( $CrI$ ) calculated from  $^{13}\text{C}$  ssNMR in C4 and C6 regions of cellulose I and cellulose II, and relative intensity of  $^{13}\text{C}$  signal in glucose C1 region

| Sample     | C4 region (%) <sup>a</sup> |                       |       | C6 region (%) <sup>a</sup> |                       |       | Glucose C1 (%) <sup>c</sup> |
|------------|----------------------------|-----------------------|-------|----------------------------|-----------------------|-------|-----------------------------|
|            | $CrI_{\text{I-NMR}}$       | $CrI_{\text{II-NMR}}$ | $A^b$ | $CrI_{\text{I-NMR}}$       | $CrI_{\text{II-NMR}}$ | $A^b$ |                             |
| MCC-0      | 55.6                       | 0                     | 44.4  | 54.6                       | 0                     | 45.4  | 0                           |
| BM-0.5-REC | 57.6                       | 36.6                  | 63.1  | 46.7                       | 28.2                  | 68.0  | 3.8                         |
| BM-2-REC   | 47.8                       | 41.3                  | 55.5  | 25.5                       | 38.1                  | 63.1  | 5.4                         |
| BM-6-REC   | 0                          | 53.3                  | 46.7  | 0                          | 48.7                  | 51.3  | 5.5                         |
| BM-24-REC  | 0                          | 56.4                  | 43.6  | 0                          | 57.5                  | 42.6  | 5.5                         |

<sup>a</sup> The total % can be  $> 100\%$ , because the relative weight of  $CrI_{\text{I}}$  and  $CrI_{\text{II}}$  is not taken into account here, *i.e.*, it should be  $(1-x)CrI_{\text{I}} + (x)CrI_{\text{II}} + A \sim 100$ , where in the C4 region:  $x = 0, 62, 79, 100, 100$ , and in the C6 region:  $x = 0, 60, 79, 100, 100$  for MCC-0, BM-0.5-REC, BM-2-REC, BM-6-REC and BM-24-REC, respectively; <sup>b</sup> the relative proportion of amorphous cellulose in C4 and C6 regions in the recrystallized BM-treated MCC, eq. (5) in the manuscript; <sup>c</sup> the relative proportion of the  $^{13}\text{C}$  signal in glucose C1 region to the total amount of cellulose signals from the C1 region.

### ATR-IR characterisation of water-exposed BM-treated MCCs

Recrystallisation of the BM-treated MCCs to cellulose II upon water exposure was also evidenced by ATR-IR and shown in **Fig. S7**). IR bands between  $3230$  and  $3488\text{ cm}^{-1}$  (OH stretching region) assigned to inter and intra molecular H-bonding in cellulose<sup>3,4</sup> changed significantly after BM (**Fig. S7 a–c**), which suggests the structural disruption of cellulose I. In addition, a band at  $\square 2918\text{ cm}^{-1}$  representing the formation of amorphous cellulose<sup>5</sup> was observed for the BM-treated MCCs, which was stronger for the as-prepared BM-treated MCCs (**Fig. S7c**) and weaker for the recrystallised counterparts (**Fig. S7b**). A shift from  $2897$  to  $2876\text{ cm}^{-1}$  was also observed for the BM-treated MCCs (**Fig. S7b** and **S7c**), which suggests the conversion of cellulose I to amorphous/cellulose II.<sup>6</sup>

ATR spectra of the BM-treated MCCs show the band at  $897\text{ cm}^{-1}$  corresponding to the emergence of amorphous cellulose. This band intensity is similar in all the IR spectra irrespective of BM treatment time (**Fig. S7d**) with only small differences in BM-0.5 spectra. However, for the recrystallised MCCs, there is a steady increase in the bands due to the formation of amorphous cellulose, and the shift to  $894\text{ cm}^{-1}$  (as shown



in Fig. S7e) is reported for the formation of cellulose II.<sup>4</sup> The cellulose II content varies with ball-milling time, which shows no significant change between BM-16-REC and BM-24-REC.

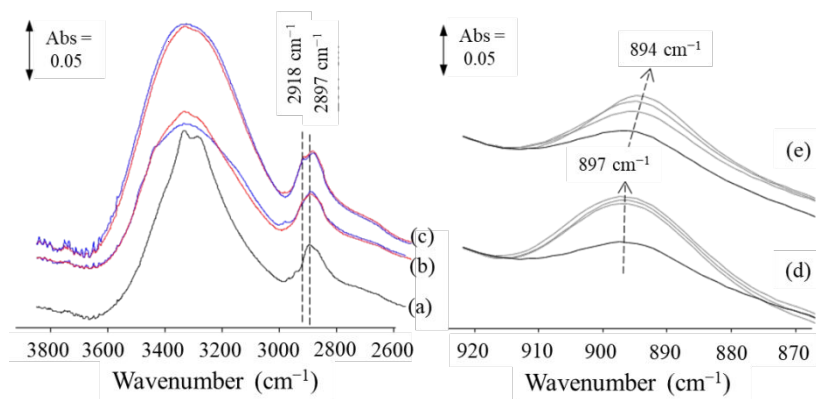

**Fig. S7.** ATR-IR spectra of (a) MCC-0-WE, (b) recrystallised BM-treated MCCs: BM-0.5-REC (red) and BM-24-REC (blue), and (c) as-prepared BM-treated MCCs: BM-0.5 (red) and BM-24 (blue); (d) MCC-0 (grey) with grey spectra showing the change in 897  $\text{cm}^{-1}$  band with milling time (BM-0.5 to BM-24), and (e) MCC-0-WE (black) with grey spectra showing the change in 897  $\text{cm}^{-1}$  band with BM time after exposure to water (BM-0.5-REC to BM-24-REC).

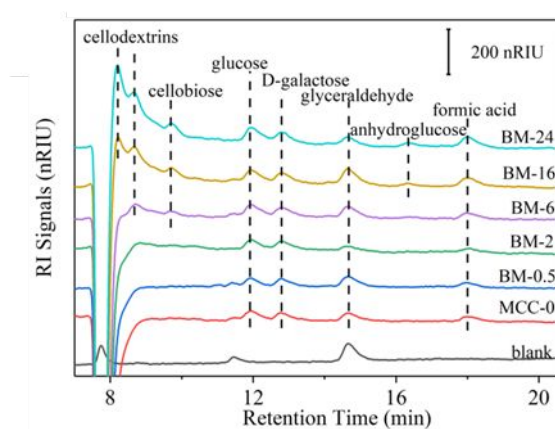

**Fig. S8.** HPLC-RI analysis of the filtrates from MCC washing: MCC-0 and BM-treated MCCs.

### Experiment to check mass-balance

Additional experiments were performed to assess the mass-balance of the systems under investigation, that is, photoreforming of both pristine cellulose (MCC-0) and 24 h ball-milled MCC (BM-24) over 0.16 wt.% Pt/TiO<sub>2</sub> catalyst. The mass of the catalyst and cellulose (*i.e.*, MCC-0 and BM-24) were weighed before the reaction. After the photoreforming reaction, the mixture of cellulose and catalyst in the solution was

centrifuged (at 4400 rpm for 10 min) and filtered. The residue (mixture of cellulose and catalyst) was then dried at 100 °C for 24 h, and the dried residue was weighed as the total mass after reaction shown in **Table S2**.

**Table S2 Mass loss of the photoreforming reaction of MCC-0 and ball-milled cellulose**

| Reaction feed     |           |          | Total mass after reaction (g) | Mass loss (g) |
|-------------------|-----------|----------|-------------------------------|---------------|
| Catalyst mass (g) | Cellulose | Mass (g) |                               |               |
| 0.076             | MCC-0     | 0.100    | 0.145                         | 0.031         |
| 0.077             | BM-24     | 0.101    | 0.144                         | 0.034         |

**Table S3 Comparison of H<sub>2</sub> production from cellulose photoreforming**

| Photocatalyst                | H <sub>2</sub> production rate (μmol h <sup>-1</sup> g <sub>Pt</sub> <sup>-1</sup> ) | Light source | Reference <sup>a</sup>         |
|------------------------------|--------------------------------------------------------------------------------------|--------------|--------------------------------|
| 0.5 wt.% Pt/TiO <sub>2</sub> | 120000                                                                               | Xe lamp      | <sup>7</sup> Kondarides et al. |
| 0.2 wt.% Pt/TiO <sub>2</sub> | 82900                                                                                | UV-A lamp    | <sup>8</sup> Lan et al.        |
| 0.5 wt.% Pt/TiO <sub>2</sub> | 45000                                                                                | UV-A lamp    | <sup>9</sup> Speltini et al.   |
| 1.0 wt.% Pt/TiO <sub>2</sub> | 23200                                                                                | Xe lamp      | <sup>10</sup> Caravaca et al.  |
| 0.5 wt.% Pt/TiO <sub>2</sub> | 8000                                                                                 | UV LED array | <sup>11</sup> Chang et al.     |
| 5.0 wt.% Pt/TiO <sub>2</sub> | 300                                                                                  | Xe lamp      | <sup>12</sup> Kawai et al.     |

<sup>a</sup> references are listed below in the ESI.

**Table S4 Normalised r<sub>H<sub>2</sub></sub> (based on Pt loading) of the ball-milled MCCs**

| Cellulose sample | r <sub>H<sub>2</sub></sub> (μmol h <sup>-1</sup> ) | Normalised r <sub>H<sub>2</sub></sub> (μmol h <sup>-1</sup> g <sub>Pt</sub> <sup>-1</sup> ) |
|------------------|----------------------------------------------------|---------------------------------------------------------------------------------------------|
| MCC-0            | 8.0                                                | 66600                                                                                       |
| BM-0.5           | 10.1                                               | 84100                                                                                       |
| BM-2             | 10.9                                               | 90800                                                                                       |
| BM-6             | 11.6                                               | 96600                                                                                       |
| BM-16            | 12.7                                               | 105900                                                                                      |
| BM-24            | 13.3                                               | 110800                                                                                      |

## References

1. Zuckerstätter, G.; Schild, G.; Wollboldt, P.; Röder, T.; Weber, H. K.; Sixta, H., The elucidation of cellulose supramolecular structure by <sup>13</sup>C CP-MAS NMR. *Lenzinger Berichte* **2009**, *87*, 38-46.
2. Idstrom, A.; Schantz, S.; Sundberg, J.; Chmelka, B. F.; Gatenholm, P.; Nordstierna, L., (<sup>13</sup>C) NMR assignments of regenerated cellulose from solid-state 2D NMR spectroscopy. *Carbohydr. Polym.* **2016**, *151*, 480-487.
3. Kondo, T., The assignment of IR absorption bands due to free hydroxyl groups in cellulose. *Cellulose* **1997**, *4* (4), 281-292.
4. Oh, S. Y.; Yoo, D. I.; Shin, Y.; Kim, H. C.; Kim, H. Y.; Chung, Y. S.; Park, W. H.; Youk, J. H., Crystalline structure analysis of cellulose treated with sodium hydroxide and carbon dioxide by means of X-ray diffraction and FTIR spectroscopy. *Carbohydr. Res.* **2005**, *340* (15), 2376-91.
5. Mohan, T.; Spirk, S.; Kargl, R.; Doliška, A.; Vesel, A.; Salzmann, I.; Resel, R.; Ribitsch, V.; Stana-Kleinschek, K., Exploring the rearrangement of amorphous cellulose model thin films upon heat treatment. *Soft Matter* **2012**, *8* (38).
6. Schwanninger, M.; Rodrigues, J. C.; Pereira, H.; Hinterstoisser, B., Effects of short-time vibratory ball milling on the shape of FT-IR spectra of wood and cellulose. *Vib. Spectrosc.* **2004**, *36* (1), 23-40.
7. Kondarides, D. I.; Daskalaki, V. M.; Patsoura, A.; Verykios, X. E., Hydrogen Production by Photo-Induced Reforming of Biomass Components and Derivatives at Ambient Conditions. *Catal. Lett.* **2007**, *122* (1-2), 26-32.
8. Lan, L.; Shao, Y.; Jiao, Y.; Zhang, R.; Hardacre, C.; Fan, X., Systematic study of H<sub>2</sub> production from catalytic photoreforming of cellulose over Pt catalysts supported on TiO<sub>2</sub>. *Chin. J. Chem. Eng.* **2020**, *28*, 2084-2091.
9. Speltini, A.; Sturini, M.; Dondi, D.; Annovazzi, E.; Maraschi, F.; Caratto, V.; Profumo, A.; Buttafava, A., Sunlight-promoted photocatalytic hydrogen gas evolution from water-suspended cellulose: a systematic study. *Photochem. Photobiol. Sci.* **2014**, *13* (10), 1410-9.
10. Caravaca, A.; Jones, W.; Hardacre, C.; Bowker, M., H<sub>2</sub> production by the photocatalytic reforming of cellulose and raw biomass using Ni, Pd, Pt and Au on titania. *Proc. Math. Phys. Eng. Sci.* **2016**, *472* (2191), 20160054. <https://doi.org/10.1098/rspa.2016.0054>
11. Chang, C.; Skillen, N.; Nagarajan, S.; Ralphs, K.; Irvine, J. T. S.; Lawton, L.; Robertson, P. K. J., Using cellulose polymorphs for enhanced hydrogen production from photocatalytic reforming. *Sustain. Energ. Fuels.* **2019**, *3* (8), 1971-1975.
12. Kawai, T.; Sakata, T., Photocatalytic hydrogen production from water by the decomposition of polyvinylchloride, protein, algae, dead insects, and excrement. *Chem. Lett.* **1981**, *10* (1), 81-84.
